# Supplementary material
Source: Springer Nature journal article supplement (https://www.springermedizin.de/resource/supplementary/12985_2014_2396_MOESM2_ESM.pdf/9607022)

a

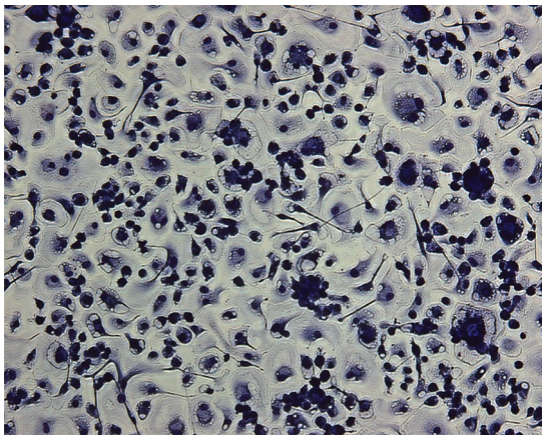

b

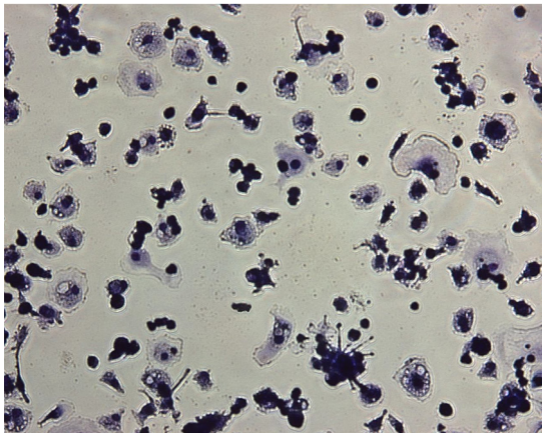

Supplement: MOESM2 [file 9607022]
